# Supplementary material for: Hydrolysis of the RNA model substrate catalyzed by a binuclear ZrIV-substituted Keggin polyoxometalate
Source: Royal Society of Chemistry journal article supplement (doi:10.1039/c5dt02077h), 2015-01-01
Supplement: c5dt02077h1.pdf [file c5dt02077h1.pdf]

## **Hydrolysis of the RNA model substrate catalyzed by a binuclear Zr<sup>IV</sup>-substituted Keggin polyoxometalate**

Thi Kim Nga Luong,<sup>a</sup> Gregory Absillis,<sup>a</sup> Pavletta Shestakova,<sup>a,b</sup> and Tatjana N. Parac-Vogt<sup>a</sup>

<sup>a</sup>Department of Chemistry, KU Leuven, Celestijnenlaan 200F, 3001 Leuven, Belgium  
E-mail: Tatjana.Vogt@chem.kuleuven.be  
[www.chem.kuleuven.be/lbc/](http://www.chem.kuleuven.be/lbc/)

<sup>b</sup>NMR Laboratory, Institute of Organic Chemistry with Centre of Phytochemistry  
Bulgarian Academy of Sciences, Acad. G. Bontchev Str., B1.9, 1113 Sofia, Bulgaria

**Supporting Information**

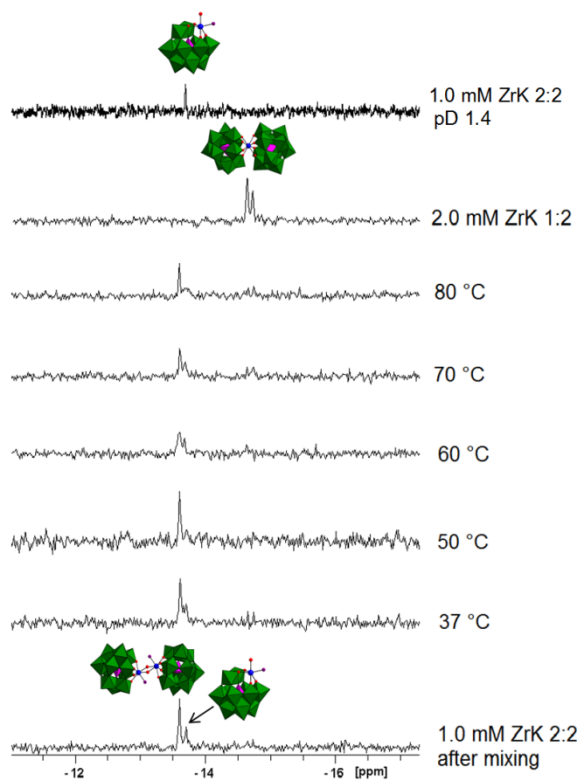

**Figure S1.** Temperature dependence of the  $^{31}\text{P}$  NMR spectra of 1.0 mM of ZrK 2:2 at pD 6.4. The spectra were recorded 1 h after mixing and heating at temperatures ranging from 37 °C to 80 °C. The  $^{31}\text{P}$  NMR spectra of 2.0 mM ZrK 1:2 at pD 6.4 and of 1.0 mM ZrK 2:2 at pD 1.4 were added for comparison. (400 MHz,  $\text{D}_2\text{O}$ , 293 K, NS = 1024, 25%  $\text{H}_3\text{PO}_4$ ).

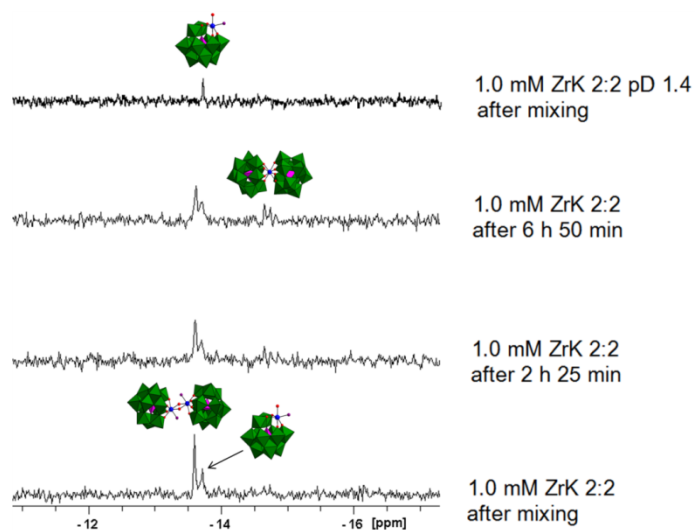

**Figure S2.** Time dependence of the  $^{31}\text{P}$  NMR spectra of 1.0 mM of ZrK 2:2. The spectra were recorded after mixing, 2 h 25 min, 6 h 50 min at pD 6.4 and 50 °C (600 MHz,  $\text{D}_2\text{O}$ , 293 K, NS = 1024, 25%  $\text{H}_3\text{PO}_4$ ).

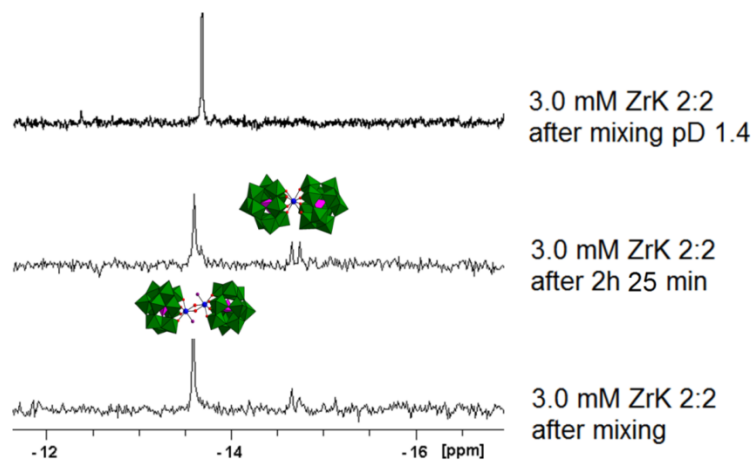

**Figure S3.** Time dependence of the  $^{31}\text{P}$  NMR spectra of 3.0 mM of ZrK 2:2. The spectra were recorded after mixing, 2 h 25 min at pD 6.4 and 50 °C (400 MHz,  $\text{D}_2\text{O}$ , 293 K, NS = 1024, 25%  $\text{H}_3\text{PO}_4$ ).

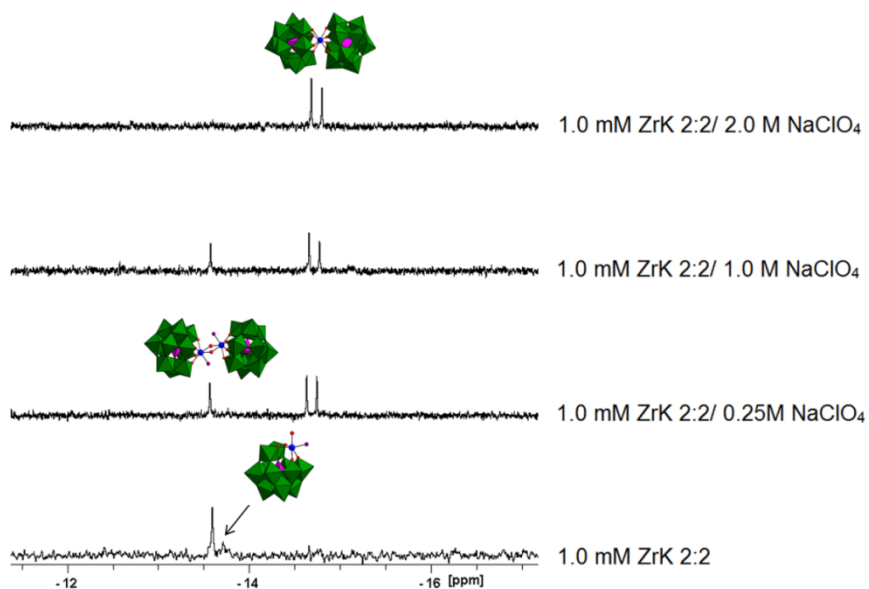

**Figure S4.**  $^{31}\text{P}$  NMR spectra of 1.0 mM of ZrK 2:2 in the presence of different (0.25 M to 2.0 M)  $\text{NaClO}_4$  concentrations (600 MHz,  $\text{D}_2\text{O}$ , 293 K, NS = 1024, 25%  $\text{H}_3\text{PO}_4$ ).

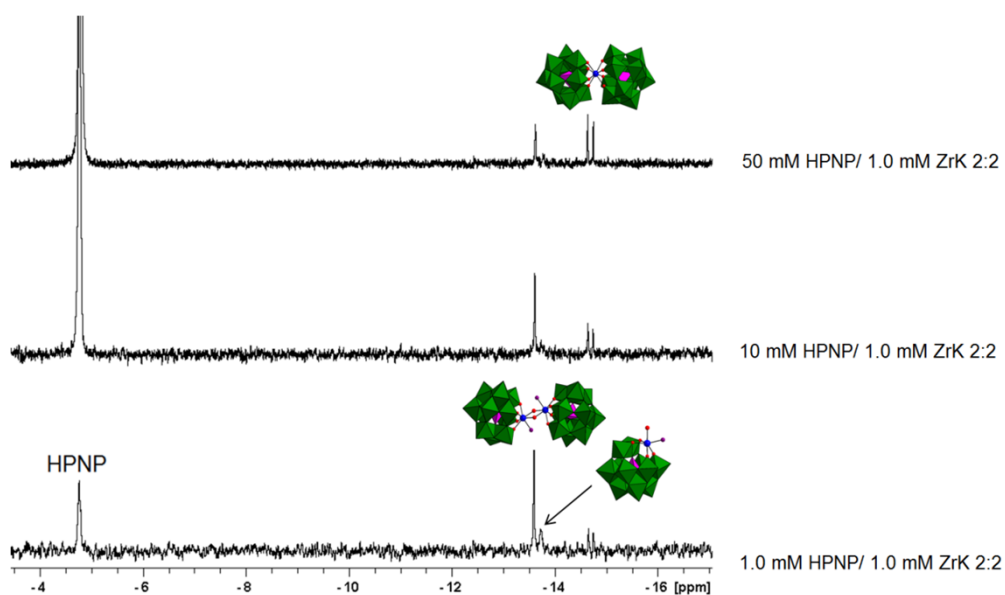

**Figure S5.**  $^{31}\text{P}$  NMR spectra of the reaction mixture of different concentrations (1 mM - 50 mM) of HPNP and 1.0 mM of ZrK 2:2 after mixing at pD 6.4. (600 MHz,  $\text{D}_2\text{O}$ , 293 K, NS = 1024, 25%  $\text{H}_3\text{PO}_4$ ).

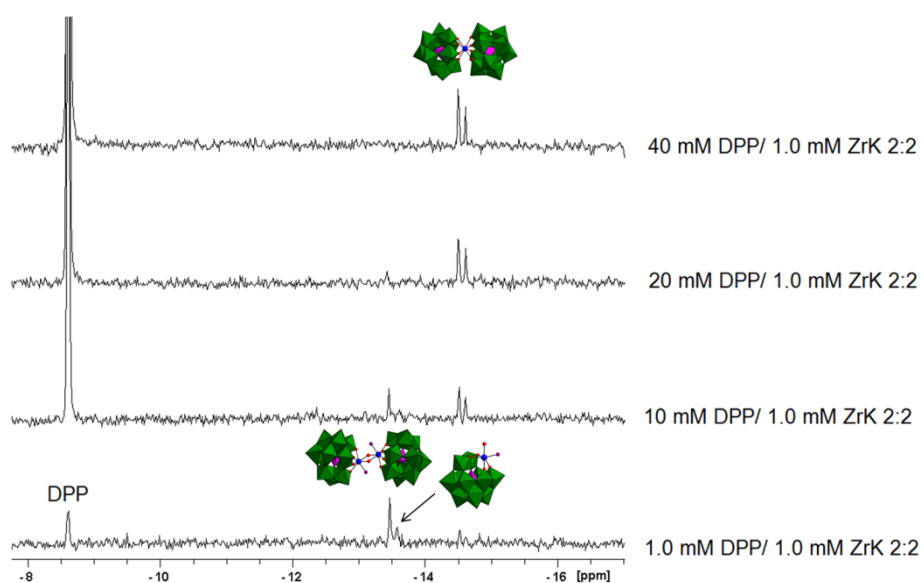

**Figure S6.**  $^{31}\text{P}$  NMR spectra of the reaction mixture of different concentrations (1 mM - 40 mM) of DPP and 1.0 mM of ZrK 2:2 after mixing at pD 6.4. (600 MHz,  $\text{D}_2\text{O}$ , 293 K, NS = 1024, 25%  $\text{H}_3\text{PO}_4$ ).

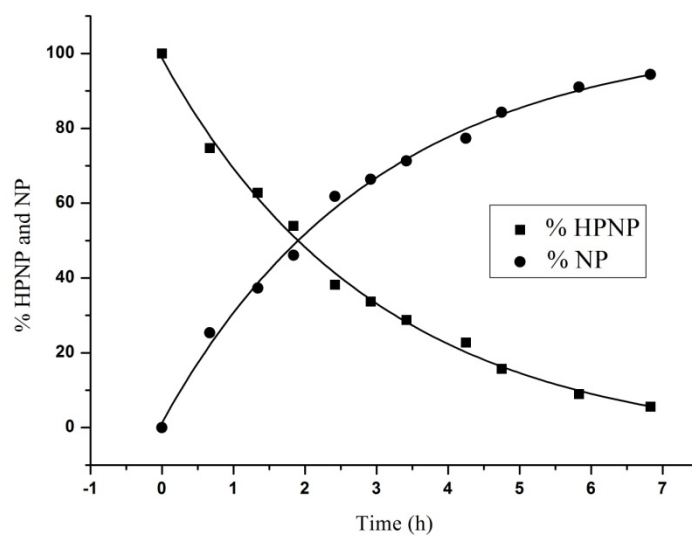

**Figure S7.** Percentage of HPNP and NP as a function of reaction time for the reaction between 1.0 mM of HPNP and 1.0 mM of ZrK 2:2 at pD 6.4 and 50 °C.

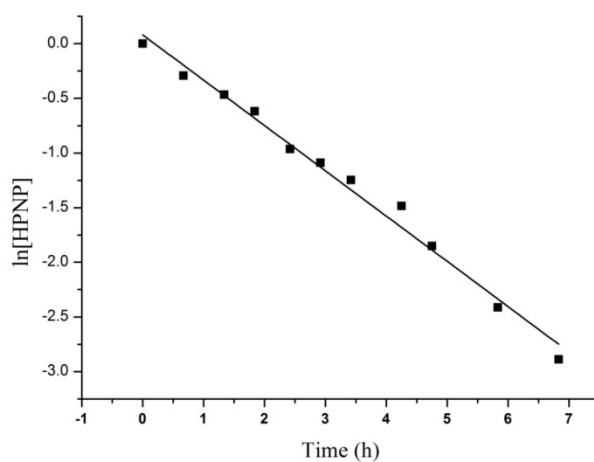

**Figure S8.**  $\ln[\text{HPNP}]$  as a function of time (linear fit with  $R^2 = 0.98$ ) for the reaction between 1.0 mM of HPNP and 1.0 mM of ZrK 2:2 at pD 6.4 and 50 °C.

**Table 1:** pD dependence of the reaction rate constant for the hydrolysis of 1.0 mM of HPNP in the presence of 1.0 mM of ZrK 2:2 at 50 °C.

| pD  | $k_{\text{obs}}^{\text{a}}$ ( $10^{-5} \text{ s}^{-1}$ ) | $k_{\text{obs}}^{\text{b}}$ ( $10^{-7} \text{ s}^{-1}$ ) | $\Delta k_{\text{obs}}$ ( $10^{-5} \text{ s}^{-1}$ ) |
|-----|----------------------------------------------------------|----------------------------------------------------------|------------------------------------------------------|
| 4.5 | $5.85 \pm 0.57$                                          | No hydrolysis after 3 months                             | /                                                    |
| 5.5 | $9.60 \pm 0.41$                                          | No hydrolysis after 3 months                             | /                                                    |
| 6.4 | $11.5 \pm 0.42$                                          | $2.17 \pm 0.11$                                          | 11.48                                                |
| 6.9 | $11 \pm 0.73$                                            | Not determined                                           | /                                                    |
| 7.5 | $9.69 \pm 0.34$                                          | $1.50 \pm 0.09$                                          | 9.68                                                 |
| 8.0 | $8.48 \pm 0.36$                                          | Not determined                                           | /                                                    |
| 8.5 | $6.09 \pm 0.58$                                          | $1.47 \pm 0.14$                                          | 6.08                                                 |
| 9.5 | $0.16 \pm 0.01$                                          | $1.47 \pm 0.08$                                          | 0.15                                                 |

<sup>a</sup> in the presence of ZrK 2:2

<sup>b</sup> in the absence of ZrK 2:2

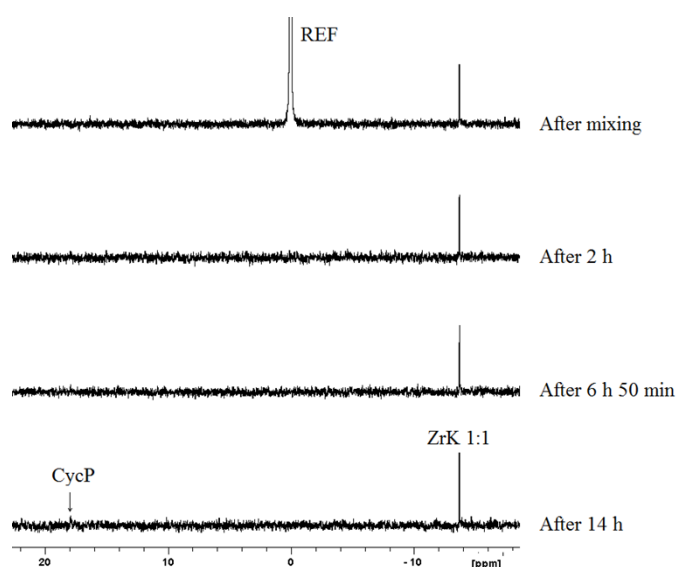

**Figure S9.**  $^{31}\text{P}$  NMR of the hydrolysis reaction between 1.0 mM of HPNP in the presence of 1.0 mM of ZrK 2:2 at different time intervals at pD 4.5 and 50 °C. (400 MHz,  $\text{D}_2\text{O}$ , 293 K, NS = 1024, 25%  $\text{H}_3\text{PO}_4$ ). The resonance of HPNP at -4.61 ppm disappeared after the addition of ZrK 2:2, suggesting that the strong binding between HPNP and this POM took place at acidic environment.

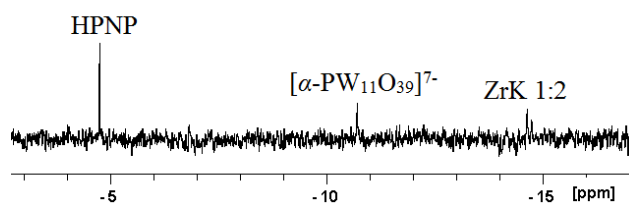

**Figure S10.** <sup>31</sup>P NMR of the hydrolysis reaction between 1.0 mM of HPNP in the presence of 1.0 mM of ZrK 2:2 at different time intervals at pD 9.5 and 50 °C. (400 MHz, D<sub>2</sub>O, 293 K, NS = 1024, 25% H<sub>3</sub>PO<sub>4</sub>).

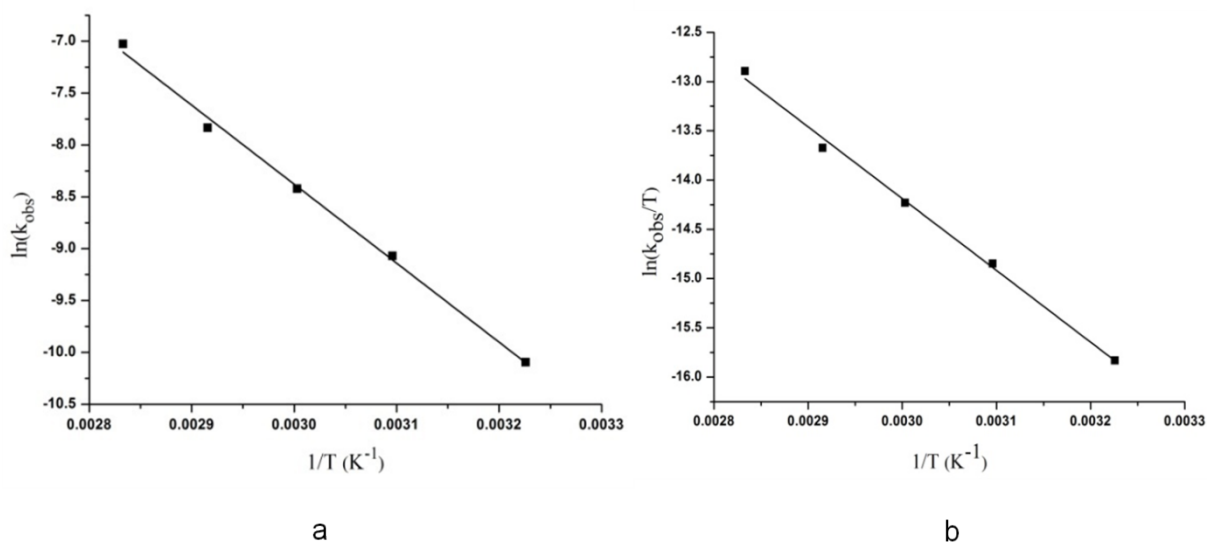

**Figure S11:** a: Arrhenius plot of ln(k<sub>obs</sub>) as a function of 1/T (

Arrhenius equation:  $\ln k_{obs} = \ln A - \frac{E_a}{R} \frac{1}{T}$ ) and b: Eyring plot of ln(k<sub>obs</sub>/T) as a function of

1/T (Eyring equation:  $\ln \frac{k_{obs}}{T} = -\frac{\Delta H^\ddagger}{R} \frac{1}{T} + \ln \frac{k_b}{h} + \frac{\Delta S^\ddagger}{R}$ ) for the hydrolysis of 1.0 mM of HPNP in the presence of 1.0 mM of ZrK 2:2 at pD 6.4.

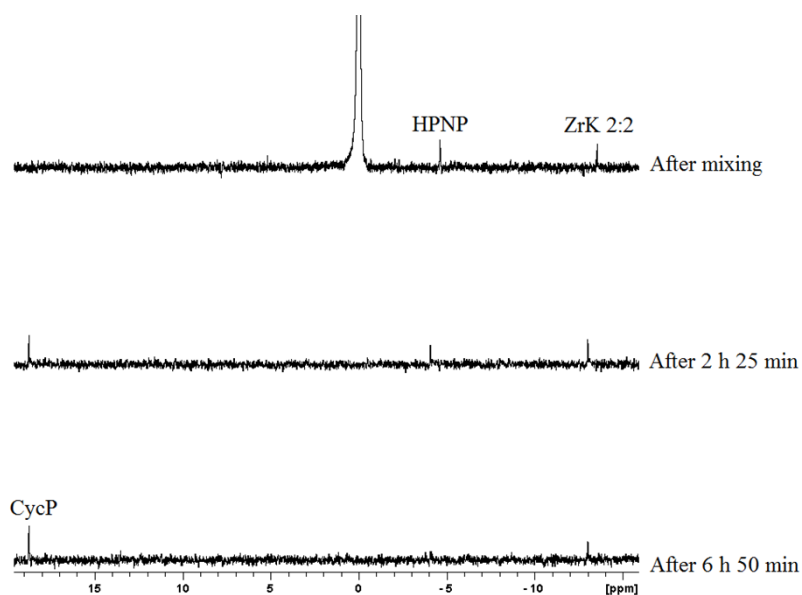

**Figure S12.**  $^{31}\text{P}$  NMR of the hydrolysis reaction between 1.0 mM of HPNP in the presence of 0.25 mM of ZrK 2:2 at different time intervals at pD 6.4 and 50 °C. (400 MHz,  $\text{D}_2\text{O}$ , 293 K, NS = 1024, 25%  $\text{H}_3\text{PO}_4$ ).

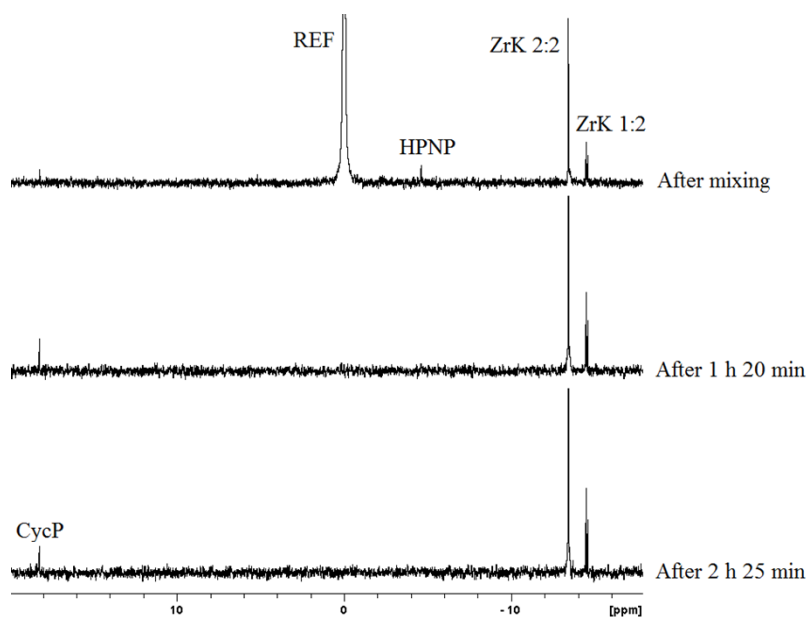

**Figure S13.**  $^{31}\text{P}$  NMR of the hydrolysis reaction between 1.0 mM of HPNP in the presence of 3.0 mM of ZrK 2:2 at different time intervals at pD 6.4 and 50 °C. (400 MHz,  $\text{D}_2\text{O}$ , 293 K, NS = 1024, 25%  $\text{H}_3\text{PO}_4$ ).



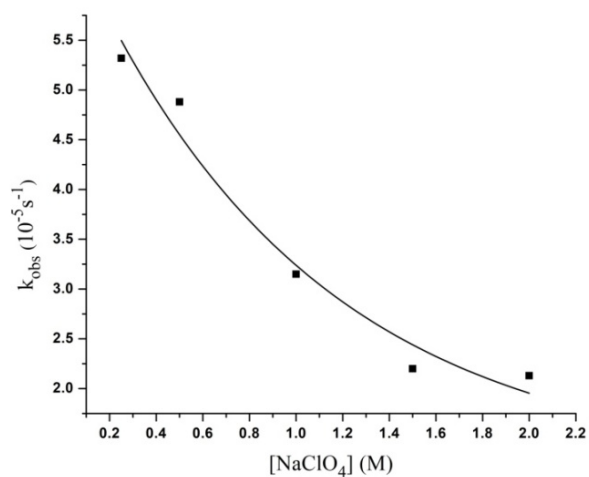

**Figure S14.** NaClO<sub>4</sub> concentration dependence on the observed rate constant for the hydrolysis of 1.0 mM of HPNP in the presence of 1.0 mM of ZrK 2:2 at pD 6.4 and 50 °C.

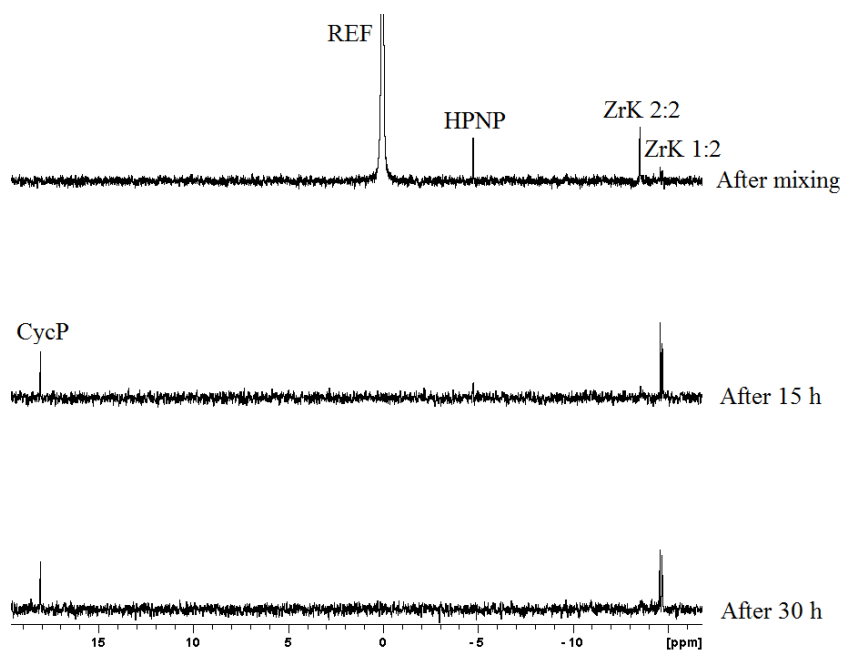

**Figure S15.** <sup>31</sup>P NMR of the hydrolysis reaction between 1.0 mM of HPNP in the presence of 1.0 mM of ZrK 2:2 and 0.25 M NaClO<sub>4</sub> at different time intervals at pD 6.4 and 50 °C. (400 MHz, D<sub>2</sub>O, 293 K, NS = 1024, 25% H<sub>3</sub>PO<sub>4</sub>).

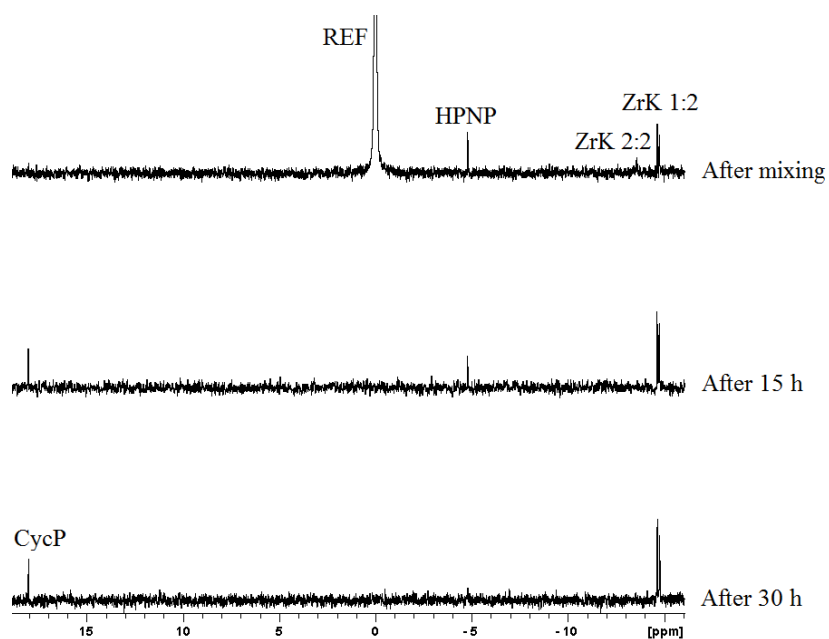

**Figure S16.**  $^{31}\text{P}$  NMR of the hydrolysis reaction between 1.0 mM of HPNP in the presence of 1.0 mM of ZrK 2:2 and 1.0 M  $\text{NaClO}_4$  at different time intervals at pD 6.4 and 50 °C. (400 MHz,  $\text{D}_2\text{O}$ , 293 K, NS = 1024, 25%  $\text{H}_3\text{PO}_4$ ).

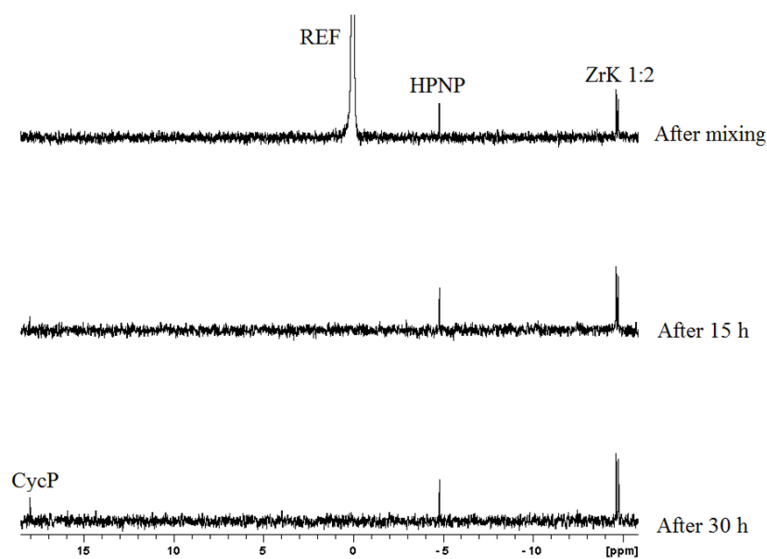

**Figure S17.**  $^{31}\text{P}$  NMR of the hydrolysis reaction between 1.0 mM of HPNP in the presence of 1.0 mM of ZrK 2:2 and 2.0 M  $\text{NaClO}_4$  at different time intervals at pD 6.4 and 50 °C. (400 MHz,  $\text{D}_2\text{O}$ , 293 K, NS = 1024, 25%  $\text{H}_3\text{PO}_4$ ).

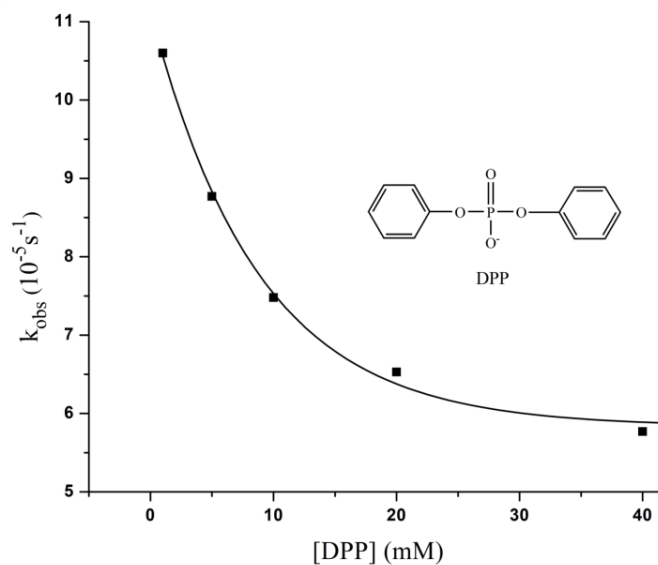

**Figure S18.** Influence of DPP concentration on the observed rate constant for the hydrolysis of 1.0 mM of HPNP in the presence of 1.0 mM of ZrK 2:2 at pH 6.4 and 50 °C.

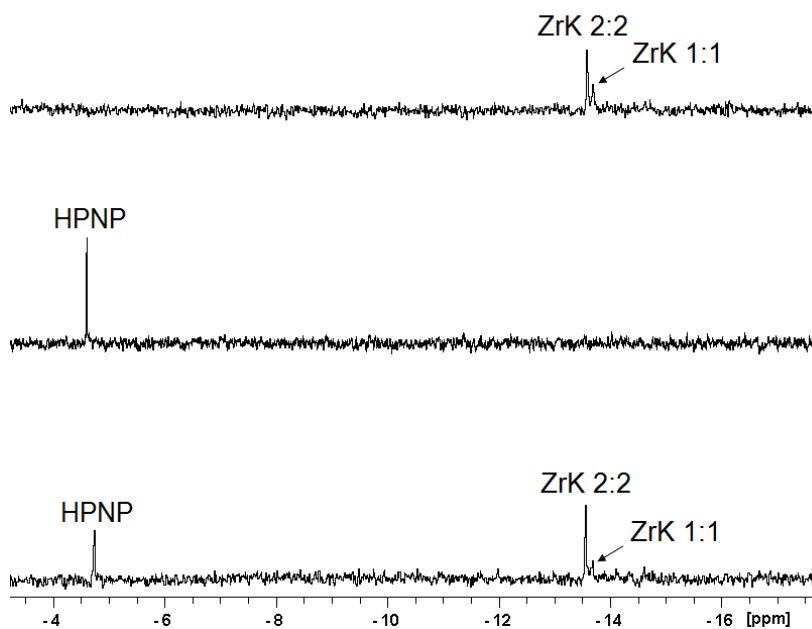

**Figure S19.**  $^{31}\text{P}$  NMR spectra (from the top to the bottom) of 1.0 mM of ZrK 2:2, 1.0 mM of HPNP, 1.0 mM of HPNP and 1.0 mM of ZrK 2:2 after mixing, at pH 6.4 and 50 °C. (400 MHz,  $\text{D}_2\text{O}$ , 293 K, NS = 1024, 25%  $\text{H}_3\text{PO}_4$ ).

Deriving the Equation 1 from the mechanism given in scheme 2

Based on Scheme 2:

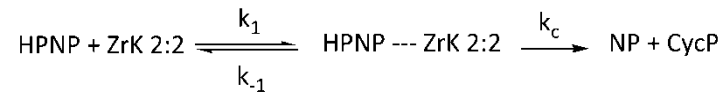

when the concentration of ZrK 2:2 is higher than the concentration of HPNP, the approximate  $k_{obs}$  is calculated by the equation:<sup>[1]</sup>

$$k_{obs} = \frac{k_1 k_c [\text{ZrK 2:2}]_0}{k_1 [\text{ZrK 2:2}]_0 + k_{-1} + k_c}$$

Considering the case  $k_1 [\text{ZrK 2:2}]_0 + k_{-1} \gg k_c$ , the approximate  $k_{obs}$  is:

$$k_{obs} = \frac{k_1 k_c [\text{ZrK 2:2}]_0}{k_1 [\text{ZrK 2:2}]_0 + k_{-1}}$$

or

$$k_{obs} = \frac{k_c [\text{ZrK 2:2}]_0}{[\text{ZrK 2:2}]_0 + k_{-1}/k_1}$$

[1] E. J. H., Mc Graw-Hill, New York, **1994**.
